# Supplementary material for: Dual role of coal fly ash in copper ion adsorption followed by thermal stabilization in a spinel solid solution
Source: PubMed Central journal article supplement — RSC Adv. 2018 Feb 27;8(16):8805–12. doi: 10.1039/c7ra11495h (PMC9078617; doi:10.1039/c7ra11495h), 2018-02-27
Supplement: RA-008-C7RA11495H-s001.pdf [file RA-008-C7RA11495H-s001.pdf]

## **Dual Roles of Coal Fly Ash in Copper Ion Adsorption Followed by Thermal Stabilization in a Spinel Solid Solution**

**Pengfei Wu<sup>1,2</sup>, Yuanyuan Tang<sup>1,3</sup>\*, Zongwei Cai<sup>2</sup>**

1. School of Environmental Science and Engineering, Southern University of Science and Technology, 1088 Xueyuan Blvd, Nanshan District, Shenzhen 518055, P. R. China.
2. State Key Laboratory of Environmental and Biological Analysis, Department of Chemistry, Hong Kong Baptist University, Hong Kong SAR, P. R. China
3. Key Laboratory of Municipal Solid Waste Recycling Technology and Management of Shenzhen City, Shenzhen 518055, P. R. China

\*Corresponding author. Dr. Yuanyuan Tang, E-mail: [tangyy@sustc.edu.cn](mailto:tangyy@sustc.edu.cn); Tel: (+86)-755-88015460

### **Supporting Information**

Including 2 equations, 5 tables and 1 figure in 8 pages

## Equations

1. The linear form of the Langmuir isotherm can be expressed as:

$$\frac{1}{q_e} = \frac{1}{c_e q_m k_L} + \frac{1}{q_m} \quad (1)$$

where  $c_e$  is the equilibrium concentration of copper ions in solution ( $\text{mg}\cdot\text{L}^{-1}$ ),  $q_e$  is the ratio between the mass of copper ions and mass of fly ash at equilibrium ( $\text{mg}\cdot\text{g}^{-1}$ ),  $q_m$  is Langmuir constant expressing the maximum adsorption capacity ( $\text{mg}\cdot\text{g}^{-1}$ ), and the constant  $k_L$  represents the adsorption free energy ( $\text{L}\cdot\text{mg}^{-1}$ ).

2. The linear form of Freundlich isotherm model is:

$$\ln q_e = \ln k_F + \frac{1}{n} \ln c_e \quad (2)$$

where  $k_F$  ( $\text{mg}^{-1/n}\cdot\text{L}^{1/n}\cdot\text{g}^{-1}$ ) relates to the adsorption capacity, and  $n$  is the dimensionless number related to surface heterogeneity. The value of  $1/n$  ranging from 0.1 to 1.0 represents a favorable adsorption conditions.

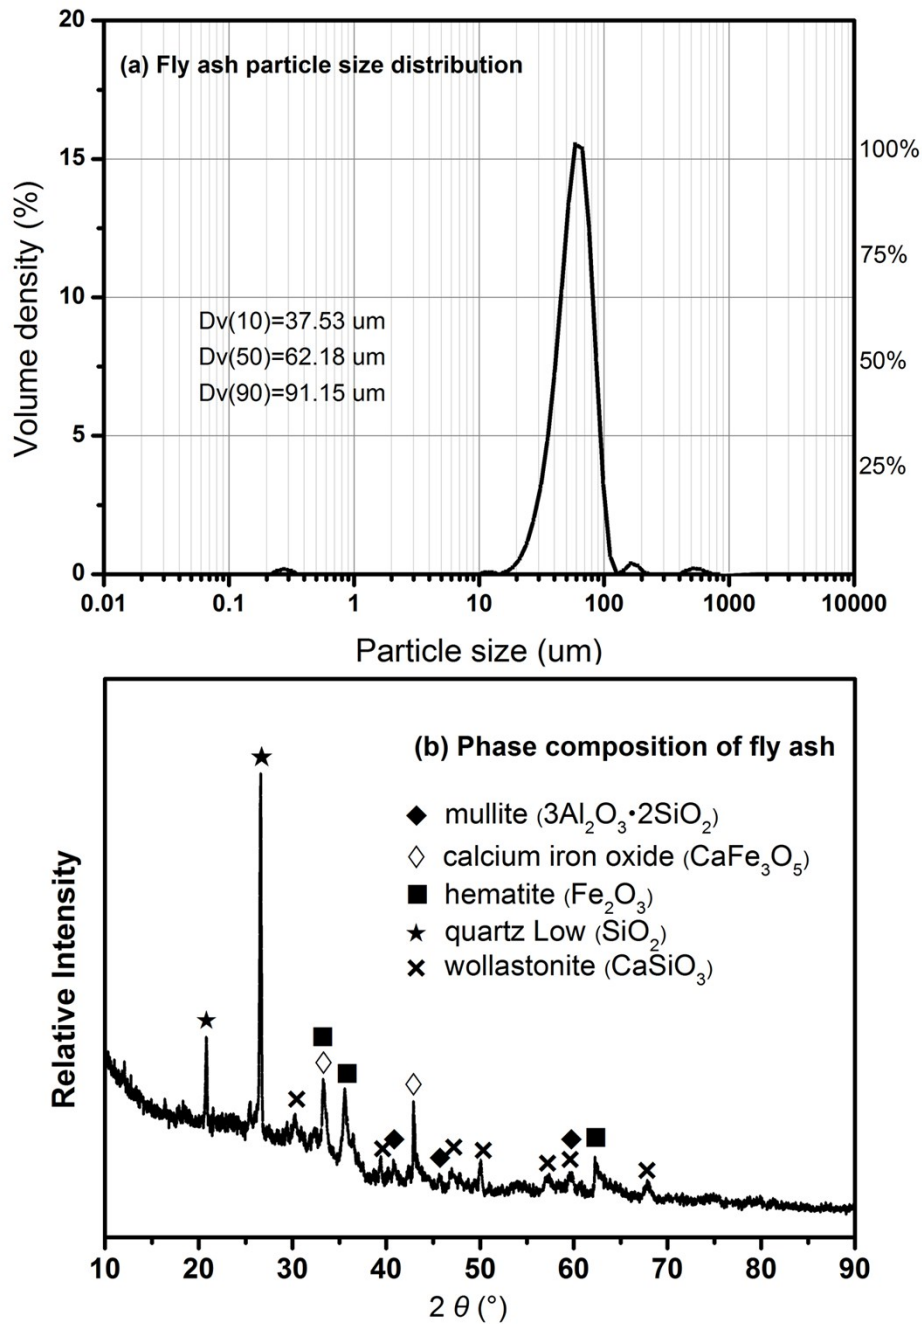

**Figure S1.** (a) The particle size distribution of the coal fly ash which  $D_v(10)$ ,  $D_v(50)$ , and  $D_v(90)$  is 37.5  $\mu\text{m}$ , 62.2  $\mu\text{m}$ , and 91.1  $\mu\text{m}$ , respectively. (b) XRD pattern of the coal fly ash used in this study. The standard patterns retrieved from the ICDD database include quartz (SiO<sub>2</sub>; PDF#89-1961), mullite (3Al<sub>2</sub>O<sub>3</sub>·2SiO<sub>2</sub>; PDF#79-1455), calcium iron oxide (CaFe<sub>3</sub>O<sub>5</sub>; PDF#72-0890), wollastonite (CaSiO<sub>3</sub>; PDF#43-1460), and hematite (Fe<sub>2</sub>O<sub>3</sub>; PDF#85-0599).

Table S1 Chemical compositions (wt%) of the coal fly ash

| Components                     | Weight Percentage (wt%) |
|--------------------------------|-------------------------|
| SiO <sub>2</sub>               | 41.6                    |
| Fe <sub>2</sub> O <sub>3</sub> | 17.3                    |
| Al <sub>2</sub> O <sub>3</sub> | 16.3                    |
| CaO                            | 15.1                    |
| MgO                            | 3.9                     |
| P <sub>2</sub> O <sub>5</sub>  | 1.6                     |
| K <sub>2</sub> O               | 1.4                     |
| SO <sub>3</sub>                | 1.3                     |
| TiO <sub>2</sub>               | 1.0                     |

The elemental compositions were measured by X-ray fluorescence spectrometry (XRF) and expressed as the basic metal oxide forms.

Table S2. EDS analysis for the dark-color matrix marked as “S” in Figure 5c in the main body of the paper

| Element | Weight % | Error% | Atomic % |
|---------|----------|--------|----------|
| O       | 25.54    | 8.76   | 36.41    |
| Al      | 6.78     | 4.43   | 5.73     |
| Si      | 56.38    | 3.99   | 53.58    |
| Cu      | 6.20     | 3.79   | 2.21     |
| Fe      | 5.10     | 3.19   | 2.07     |

Table S3. EDS analysis for the  $\text{CuAl}_x\text{Fe}_{2-x}\text{O}_4$  spinel solid solution marked as “C” in Figure 5c in the main body of the paper

| Element | Weight % | Error% | Atomic % |
|---------|----------|--------|----------|
| O       | 27.63    | 6.54   | 52.09    |
| Al      | 15.34    | 3.27   | 17.14    |
| Si      | 3.20     | 2.22   | 4.02     |
| Cu      | 33.38    | 2.87   | 15.73    |
| Fe      | 20.45    | 3.11   | 11.02    |

Table S4. EDS analysis for the light-color grains marked as “C” in Figure 5d in the main body of the paper

| Element | Weight % | Error% | Atomic % |
|---------|----------|--------|----------|
| O       | 35.18    | 7.26   | 61.36    |
| Al      | 14.24    | 3.34   | 14.72    |
| Cu      | 28.66    | 2.65   | 12.49    |
| Fe      | 22.92    | 4.02   | 11.42    |

Table S5. EDS analysis for the light-color grains marked as “A” in Figure 5d in the main body of the paper

| Element | Weight percentage (%) | Atomic percentage (%) | Error (%) |
|---------|-----------------------|-----------------------|-----------|
| O       | 45.18                 | 59.95                 | 2.53      |
| Al      | 48.25                 | 37.94                 | 4.65      |
| Cu      | 4.21                  | 1.40                  | 3.28      |
| Fe      | 1.86                  | 0.71                  | 2.01      |
